# Supplementary material for: IgE Aggravates the Senescence of Smooth Muscle Cells in Abdominal Aortic Aneurysm by Upregulating LincRNA-p21
Source: PubMed Central journal article supplement (PMC6675527; doi:10.14336/ad.2018.1128), 2019-08-01
Supplement: AD-10-4-699-s.pdf [file AD-10-4-699-s.pdf]

## SUPPLEMENTARY DATA

# **IgE Aggravates the Senescence of Smooth Muscle Cells in Abdominal Aortic Aneurysm by Upregulating LincRNA-p21**

**Wenjun Guo<sup>#</sup>, Ran Gao<sup>#</sup>, Wei Zhang<sup>#</sup>, Weipeng Ge, Meng Ren, Bolun Li, Hongmei Zhao, Jing Wang<sup>\*</sup>**

State Key Laboratory of Medical Molecular Biology, Institute of Basic Medical Sciences, Chinese Academy of Medical Sciences, Department of Pathophysiology, Peking Union Medical College, Beijing, China

# SUPPLEMENTARY DATA

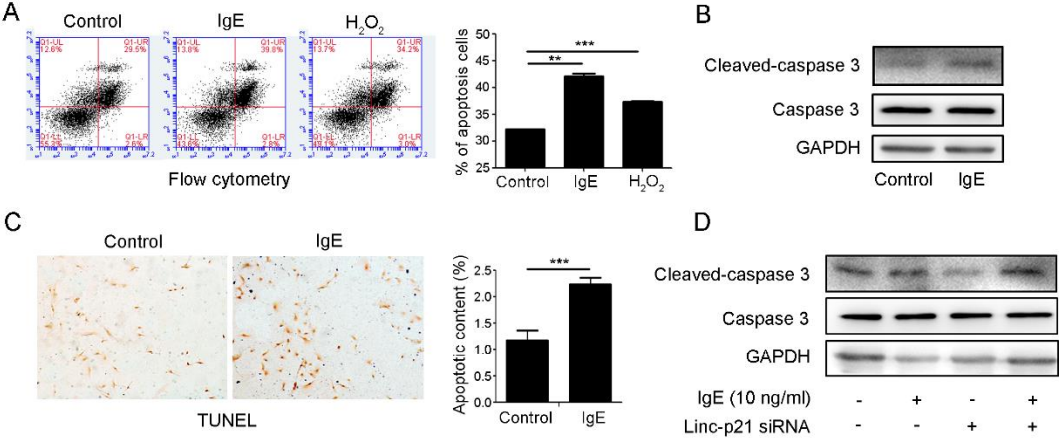

**Supplementary Figure 1. IgE effect on apoptosis of vascular SMCs *in vitro*.** (A) Flow cytometry detection of apoptosis of human vascular smooth muscle cells. (B) Western blotting analysis of cleaved-caspase 3 and caspase 3 expression in human vascular smooth muscle cells stimulated by IgE. (C) Representative images from TUNEL staining of human vascular smooth muscle cells. (D) Western blotting analysis of cleaved-caspase 3 and caspase 3 expression in human vascular smooth muscle cells stimulated by IgE and Linc-p21 siRNA. Data information: Data are presented as mean ± SEM. \*P < 0.05; \*\*P < 0.01; \*\*\*P < 0.001.
